# Supplementary material for: circFGFR4 Promotes Differentiation of Myoblasts via Binding miR-107 to Relieve Its Inhibition of Wnt3a
Source: PubMed Central journal article supplement — Mol Ther Nucleic Acids. 2018 Mar 6;11:272–83. doi: 10.1016/j.omtn.2018.02.012 (PMC5992882; doi:10.1016/j.omtn.2018.02.012), 2018-03-06
Supplement: mmc1.pdf [file mmc1.pdf]

**OMTN, Volume 11**

**Supplemental Information**

**circFGFR4 Promotes Differentiation of Myoblasts  
via Binding miR-107 to Relieve Its Inhibition  
of Wnt3a**

**Hui Li, Xuefeng Wei, Jiameng Yang, Dong Dong, Dan Hao, Yongzhen Huang, Xianyong Lan, Martin Plath, Chuzhao Lei, Yun Ma, Fengpeng Lin, Yueyu Bai, and Hong Chen**

## Supplementary information

**Table S1 Stem-loop primers for reverse-transcribed miRNAs**

| <b>miRNA ID</b> | <b>stem-loop primer</b>                           |
|-----------------|---------------------------------------------------|
| bta-miR-378     | gtcgtatccagtcaggggtccgaggtattcgactggatacgacGCCTTC |
| bta-miR-107     | gtcgtatccagtcaggggtccgaggtattcgactggatacgacGATAGC |
| bta-miR-25      | gtcgtatccagtcaggggtccgaggtattcgactggatacgacTCAGAC |
| bta-miR-101     | gtcgtatccagtcaggggtccgaggtattcgactggatacgacTTCAGT |
| bta-miR-128     | gtcgtatccagtcaggggtccgaggtattcgactggatacgacAAAGAG |
| bta-miR-140     | gtcgtatccagtcaggggtccgaggtattcgactggatacgacTCCGTG |
| bta-miR-7f      | gtcgtatccagtcaggggtccgaggtattcgactggatacgacAACTAT |
| bta-miR-499     | gtcgtatccagtcaggggtccgaggtattcgactggatacgacAAACAT |
| bta-miR-423-5p  | gtcgtatccagtcaggggtccgaggtattcgactggatacgacAAAGTC |

**Table S2 Primers for qPCR**

| <b>miRNA ID</b> | <b>Forward primer 5'→3'</b> | <b>Reverse primer 5'→3'</b> |
|-----------------|-----------------------------|-----------------------------|
| Bta-miR-107     | ggAGCAGCATTGTACAGGGCTATC    | GCAGGGTCCGAGGTATTC          |
| bta-miR-378     | gcgcACTGGACTTGGAGTC         | GCAGGGTCCGAGGTATTC          |
| bta-miR-25      | gcgcgcCATTGCACTTGTCTC       | GCAGGGTCCGAGGTATTC          |
| bta-miR-101     | gcgcgcgcTACAGTACTGTGATA     | GCAGGGTCCGAGGTATTC          |
| bta-miR-128     | gcgcTCACAGTGAACCGGT         | GCAGGGTCCGAGGTATTC          |
| bta-miR-140     | gcgcgcTACCACAGGGTAGAA       | GCAGGGTCCGAGGTATTC          |
| bta-miR-7f      | gcgcgcacaTGAGGTAGTAGATTG    | GCAGGGTCCGAGGTATTC          |
| bta-miR-499     | gcgcgcTTAAGACTTGCAGTG       | GCAGGGTCCGAGGTATTC          |
| bta-miR-423-5p  | atttTGAGGGGCAGAGAGC         | GCAGGGTCCGAGGTATTC          |
| U6              | GCTTCGGCAGCACATATACTAAAAT   | CGCTTCACGAATTTGCGTGTGCAT    |
| Wnt3a           | GCAGAGGGCATCAAATC           | CTGTTGTTGATGGTGGTG          |
| β-actin         | CATCCTGACCCTCAAGTA          | CTCGTTGTAGAAGGTGTG          |
| MyHC            | TGCTCATCTACCAAGTTCC         | CACTCTTCACTCTCATGGACC       |
| MyoG            | CAAATCCACTCCCTGAAA          | GCATAGGAAGAGATGAACA         |
| MyoD            | ACGGCATGATGGACTACAGC        | AGGCAGTCGAGGCTCGACA         |
| BCL-2           | ATGACCGAGTACCTGAAC          | CATACAGCTCCACAAAGG          |
| Caspase9        | TGGTGGTCATCCTGTCTC          | CATCCATCTGTGCCATAAAC        |
| Caspase3        | AGAACTGGACTGTGGTATT         | TCTGCCTCAACTGGTATT          |
| P53             | CACAGCCAAAGAAGAAAC          | CTCTCGGAACATCTCATAG         |

|           |                      |                     |
|-----------|----------------------|---------------------|
| PCNA      | TCCAGAACAAGAGTATAGC  | TACAACAGCATCTCCAAT  |
| CyclinD1  | CCGTCCATGCGGAAGATC   | CAGGAAGCGGTCCAGGTAG |
| CircFGFR4 | GGCAACTCCATCGGCCTTTC | CCGCAGCATAACCGCAC   |

**Table S3 Primers for vector construction**

| Name                        | Primer sequence 5'→3'                          |
|-----------------------------|------------------------------------------------|
| pcDNA-circFGFR4-F           | CCCA <u>AAGCTTTT</u> TACCCCCAGCAAGCACCT        |
| pcDNA-circFGFR4-R           | GGGGT <u>ACCACGT</u> GCCCATTCAAGGGGC           |
| Psi-CHECK-circFGFR4-W-F     | CCG <u>CTCGAG</u> ACGACTTCTTTGTCAGAAAGAC       |
| Psi-CHECK-circFGFR4-W-R     | ATAAGAAT <u>GCGGCCG</u> CATTCTCTAAGTCAGGATCCA  |
| Psi-CHECK-circFGFR4-Mut-F   | GCCTGTGCGGTTATCATACGGGCGGGCTGAGC               |
| Psi-CHECK-circFGFR4-Mut-R   | GCTCAGCCCGCCCGTATGATAACCGCACAGGC               |
| Psi-CHECK-Wnt3a-3'UTR-W-F   | CCG <u>CTCGAG</u> GGCTTACCTGGTGTGTTCG          |
| Psi-CHECK-Wnt3a-3'UTR-W-R   | ATAAGAAT <u>GCGGCCG</u> CTCTGTTTGTCTAGCTCCTGTG |
| Psi-CHECK-Wnt3a-3'UTR-Mut-F | ATTTTATTTCCACCGATGCTATATCCACCAT                |
| Psi-CHECK-Wnt3a-3'UTR-Mut-R | ATGGTGGATATAGCATCGGTGGAAATAAAAT                |

Notes: The nucleotides with underline is the restriction enzyme cutting site.

**Figure S1**

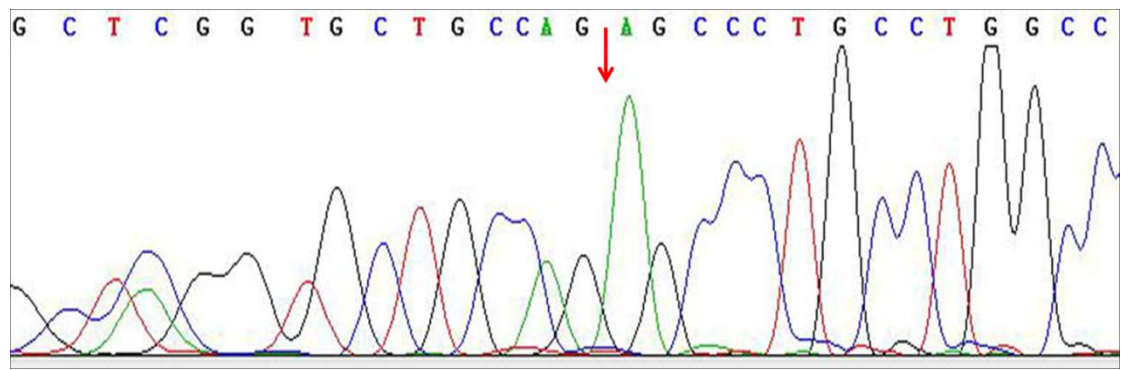

**Text S1: CircFGFR4 sequence**

circFGFR4>AGCCCTGCCTGGCCCCAGCCCGGAGCAGCAAGAGCAGGAGT  
TGACGGTGGCCCTTGGGCAGCCTGTGCGGTTATGCTGCGGGCGGGCTGAG  
CGCAGTGGCCACTGGTACAAGGAGGGCAGTCGCCTGACACCTGCTGGCCG  
GGTACGAGGCTGGAGAGGCCGCTTGGAGATTGCCAGCTTCCTACCCGAGG  
ATGCTGGCCAGTACCTCTGCCTATCACGAGGCTCCTTGCTTCTGCACAACG  
TCACCTTGGTTGTGGACGACTCCATGACCTCCAGCAATGGCGACGAGGAC  
CCCAAGATCCACAGGGGCCCCTTGAATGGGCACGTTTACCCCCAGCAAGC  
ACCCTACTGGACGCACCCCCAGCGCATGGAGAAGAACTGCATGCTGTGC  
CTGCCGGGAACACCGTCAAGTTCCGCTGTCCAGCTGCAGGCAACCCCATG  
CCCACCATCCGCTGGCTCAAGGATGGACAGGACTTCCACGGGGAGCATCG  
CATTGGAGGCATTCGGCTGCGCCACCAGCACTGGAGCCTGGTGATGGAAA  
GCGTGGTGCCCTCTGACCGTGGCACTTACACCTGCCTCGTGGAGAATTCTT  
TGGGCAGCATTGCTATAGCTACCTGCTGGACGTGCTGGAGCGGTCCCCGC  
ACCGGCCCATCCTTCAGGCAGGGCTCCCAGCCAACACCACGGCTGTGGTG  
GGCAGTGACGTGGAAGTCTGCTCTGCAAGGTGTACAGCGACGCCAGCCCCA  
CATCCAGTGGCTGAAGCACATCGTCATCAACGGCAGCAGCTTCGGTGCCG  
ACGGCTTCCCCTATGTGCAAGTCTTAAAGACAGCGGACATCAATAGCTCAG  
AGGTGGAGGTCTTGTACCTTCGGAATGTATCTGCTGAGGATGCAGGCGAGT  
ACACCTGCCTGGCGGGCAACTCCATCGGCCTTTCCTACCAGTCGGCCTGGC  
TCACGGTGCTGCCAG
